# Supplementary material for: High-resolution digital mapping of soil organic carbon in permafrost terrain using machine learning: a case study in a sub-Arctic peatland environment
Source: Copernicus journal article supplement (doi:10.5194/bg-15-1663-2018), 2018-03-21
Supplement: Supplementary file 1 [file bg-15-1663-2018-supplement.pdf]

Supplement of Biogeosciences, 15, 1663–1682, 2018  
<https://doi.org/10.5194/bg-15-1663-2018-supplement>  
© Author(s) 2018. This work is distributed under  
the Creative Commons Attribution 4.0 License.

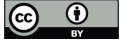

*Supplement of*

## **High-resolution digital mapping of soil organic carbon in permafrost terrain using machine learning: a case study in a sub-Arctic peatland environment**

**Matthias B. Siewert**

*Correspondence to:* Matthias B. Siewert ([matthias.siewert@umu.se](mailto:matthias.siewert@umu.se))

The copyright of individual parts of the supplement might differ from the CC BY 4.0 License.

Table S 1: Description of the individual land cover classes adapted from Andersson (2016)

| Land cover class                 | Description                                                                                                                                                                                                                                                                                                                                                                                |
|----------------------------------|--------------------------------------------------------------------------------------------------------------------------------------------------------------------------------------------------------------------------------------------------------------------------------------------------------------------------------------------------------------------------------------------|
| Bare ground                      | Exposed bedrock, blockfields, rock fragments covered ground or barren unvegetated soil with no or very little vegetation cover; vegetation includes mosses in patches of few centimeters in diameter and lichens.                                                                                                                                                                          |
| Alpine heath tundra              | Areas above the tree line >~500 m a.s.l., covered by low growing vegetation from few centimeters to few decimeter height, often alternating with exposed bare soil or rocks; low growing deciduous and evergreen shrubs, including <i>Betula nana</i> , <i>Empetrum sp.</i> , mosses and lichens. Can be associated with cryoturbation landforms such as solifluction lobes and mud boils. |
| Alpine willow                    | Alpine areas above the Birch tree line covered by low growing willow ( <i>Salix sp.</i> ) shrubs mostly confined to wind protected depressions along river pathways with wet soil conditions and micro-climate.                                                                                                                                                                            |
| Birch forest                     | Forest dominated by mountain birch ( <i>Betula pubescens ssp. czerepanovii</i> ); tree height is 2–15 m; trees can have single stems (monocormic) or grow with many stems divided near the ground (polycormic); birch forest is restricted to areas below ~600 m altitude.                                                                                                                 |
| Sparse birch forest              | Lower elevation areas with spread-out clusters of birch trees ( <i>Betula pubescens ssp. Czerepanovii</i> ) over boulder fields with disrupted soil cover.                                                                                                                                                                                                                                 |
| Dwarf shrub                      | Areas covered by small shrubs up to ~50 cm high. Mainly in subalpine terrain at the transition from birch forest to alpine heath tundra, but also adjacent to lowland wetland areas over boulder terrain.                                                                                                                                                                                  |
| Forested wetland                 | Forested areas with trees higher than 2 m ( <i>Betula pubescens ssp. Czerepanovii</i> and <i>Salix sp.</i> ) and seasonally waterlogged ground conditions. The ground has significant peat accumulation. On alluvial fans fern can cover the ground.                                                                                                                                       |
| Lowland shrub wetland            | Fen areas with substantial growth of dwarf shrubs, mostly low growing willow ( <i>Salix sp.</i> ); ground cover is tall graminoids and <i>Sphagnum sp.</i> Found close to streams and rivers.                                                                                                                                                                                              |
| <i>Sphagnum</i> wetland          | Waterlogged fen areas with continuous <i>Sphagnum sp.</i> ground cover and some graminoids. No distinction between ombrotrophic and minerotrophic areas was made.                                                                                                                                                                                                                          |
| Sedge/ <i>Eriophorum</i> wetland | Waterlogged wetland areas with standing water and dominated by <i>Carex sp.</i> and <i>Eriophorum sp.</i> . Often transitions into lakes and ponds. Mostly minerotrophic areas surrounding the peat plateaus or small wetlands surrounded by birch forest.                                                                                                                                 |
| Peat Bog                         | Dry elevated ombrotrophic wetland areas, mostly in form of palsa plateaus elevated by the occurrence of permafrost; vegetation includes growing evergreen and deciduous shrubs such as <i>Empetrum hermaphroditum</i> and <i>Betula nana</i> , <i>Rubus chamaemorus</i> , mosses and lichens.                                                                                              |
| Water                            | Water bodies with a minimum area of 130 m <sup>2</sup> including rivers, ponds and lakes. Including Torneträsk lake; masked layer.                                                                                                                                                                                                                                                         |
| Artificial surfaces              | Street, railway and buildings including a buffer margin; masked layer.                                                                                                                                                                                                                                                                                                                     |

Table S 2: Confusion matrix of the land cover classification based on 108 ground control points.

|                         | Bare rock | Alpine heath tundra | Dwarf shrub | Alpine willow | Sparse Birch Forest | Birch Forest | Forested wetland | Sedge wetland | Lowland shrub wetland | <i>Sphagnum</i> wetland | Peat bog | Samples (N: 108) |
|-------------------------|-----------|---------------------|-------------|---------------|---------------------|--------------|------------------|---------------|-----------------------|-------------------------|----------|------------------|
| Bare rock               | 5         | 3                   | 1           | 0             | 0                   | 0            | 0                | 0             | 0                     | 0                       | 0        | 9                |
| Alpine heath tundra     | 0         | 6                   | 0           | 0             | 0                   | 0            | 0                | 0             | 0                     | 0                       | 0        | 6                |
| Dwarf shrub             | 1         | 1                   | 4           | 1             | 0                   | 0            | 0                | 0             | 0                     | 0                       | 0        | 7                |
| Alpine willow           | 0         | 1                   | 1           | 3             | 1                   | 1            | 0                | 0             | 0                     | 0                       | 0        | 7                |
| Sparse Birch Forest     | 0         | 0                   | 1           | 0             | 11                  | 0            | 0                | 0             | 0                     | 0                       | 0        | 12               |
| Birch Forest            | 0         | 0                   | 1           | 1             | 4                   | 21           | 0                | 0             | 0                     | 0                       | 0        | 27               |
| Forested wetland        | 0         | 0                   | 0           | 0             | 0                   | 0            | 6                | 0             | 0                     | 0                       | 0        | 6                |
| Sedge wetland           | 0         | 0                   | 1           | 0             | 0                   | 0            | 0                | 7             | 0                     | 1                       | 3        | 12               |
| Lowland shrub wetland   | 0         | 0                   | 0           | 0             | 0                   | 0            | 1                | 0             | 4                     | 0                       | 0        | 5                |
| <i>Sphagnum</i> wetland | 0         | 0                   | 0           | 0             | 0                   | 0            | 0                | 0             | 0                     | 2                       | 2        | 4                |
| Peat bog                | 1         | 0                   | 0           | 0             | 0                   | 0            | 0                | 0             | 0                     | 1                       | 11       | 13               |
| Overall Accuracy        | 74%       |                     |             |               |                     |              |                  |               |                       |                         |          |                  |
| Kappa                   | 0.71      |                     |             |               |                     |              |                  |               |                       |                         |          |                  |

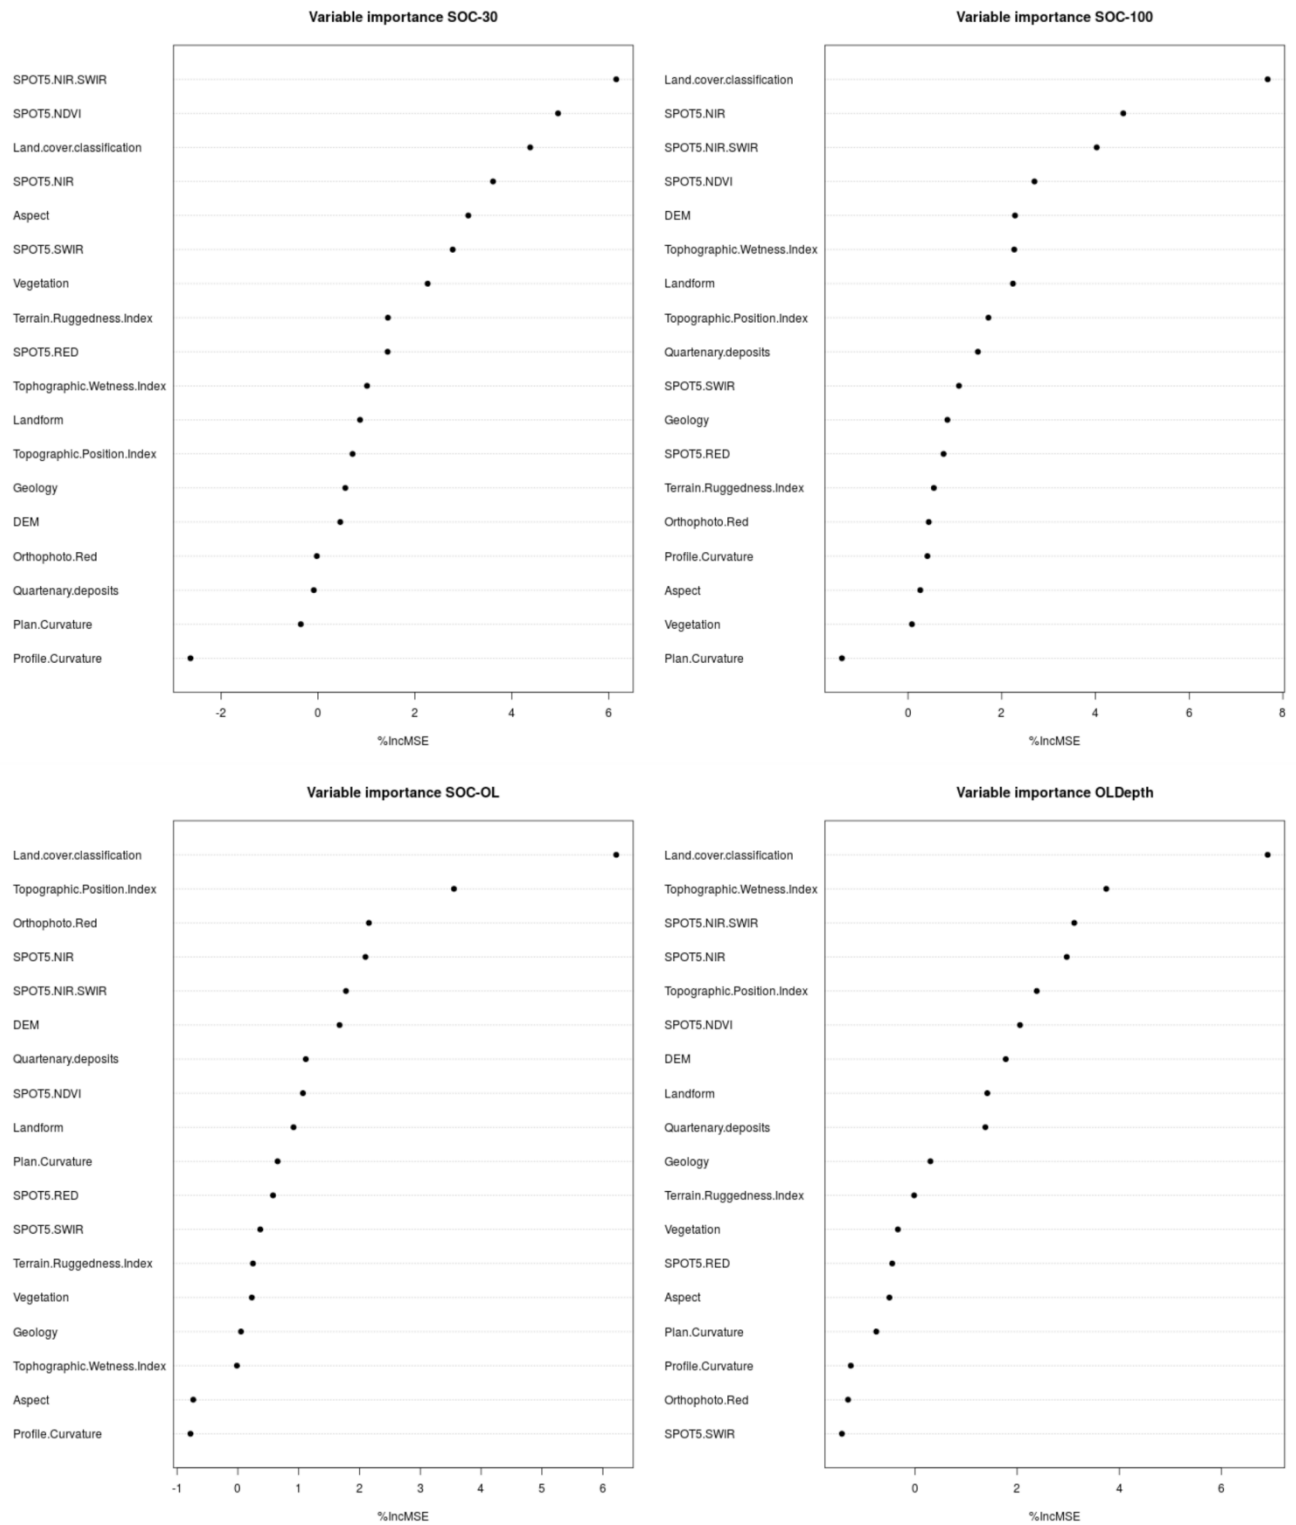

Figure S 1: Variable importance plots for individual random forests prediction models of SOC-30, SOC 0-100, SOC-OL and OL-Depth measured in mean decrease in accuracy (% IncMSE).



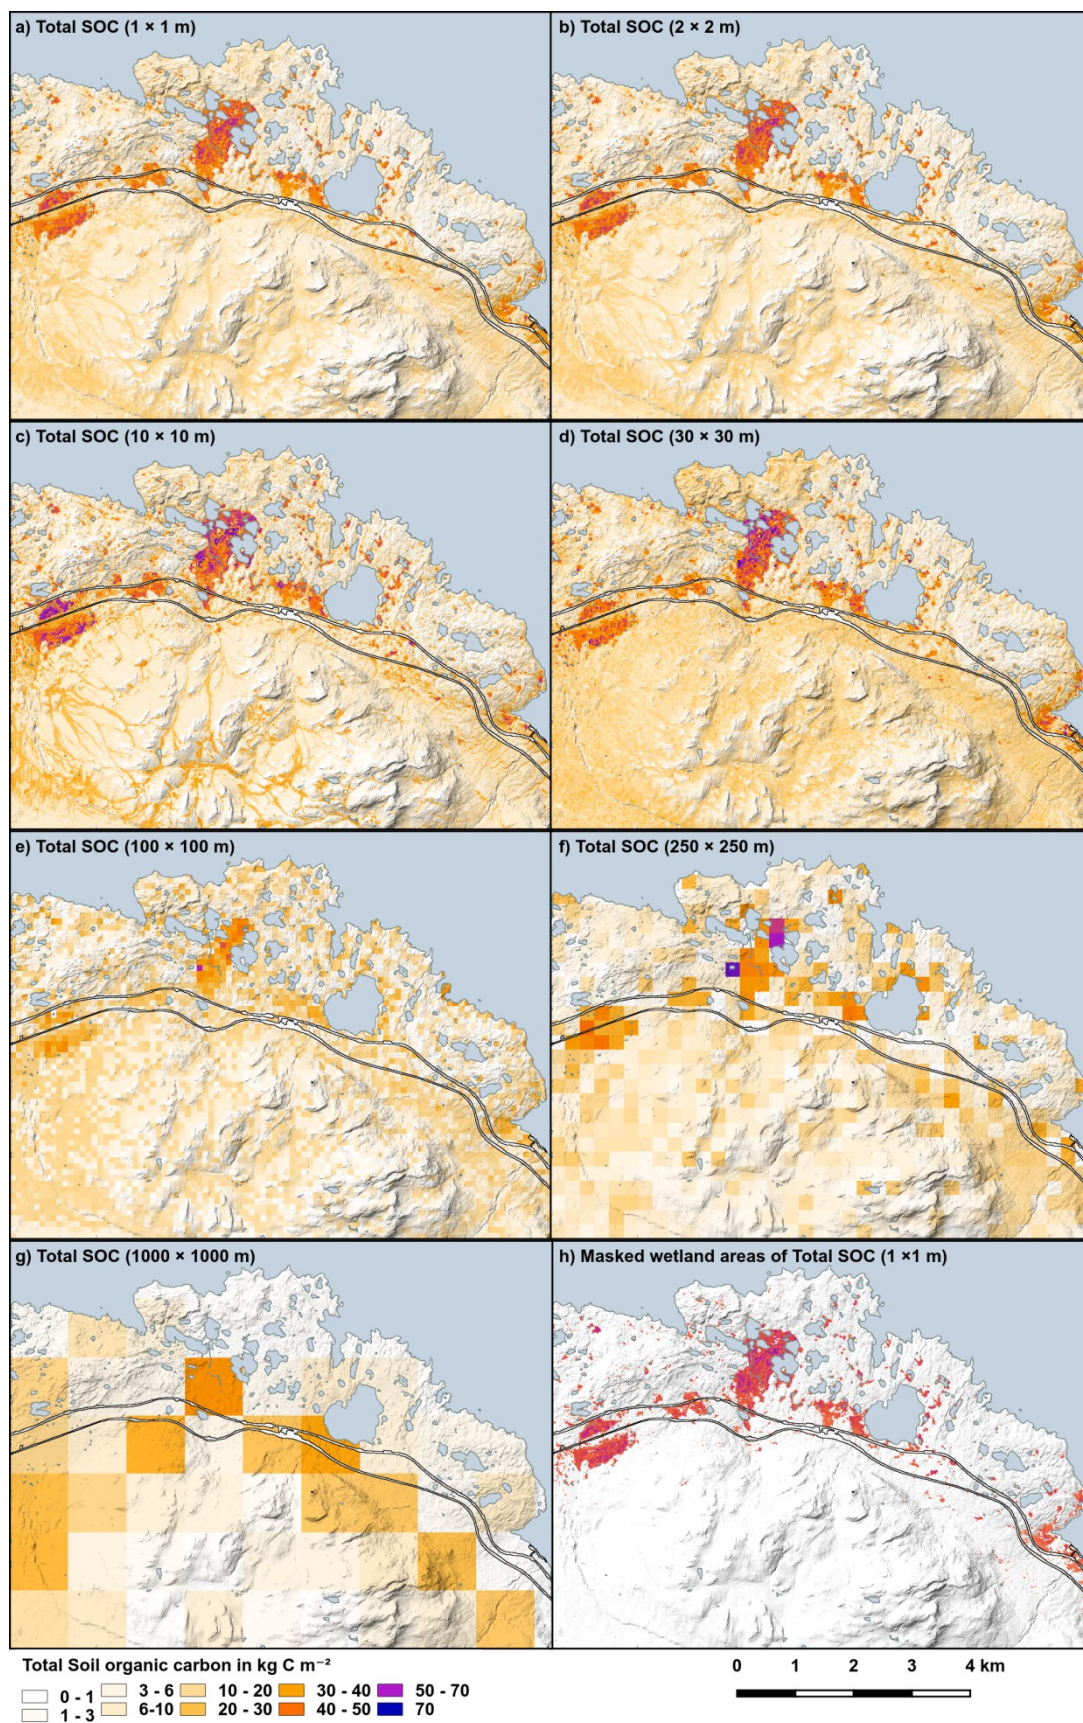

Figure S 2: Maps of SOC– Tot developed using the random forests model at resolutions of: a) 1 m, b) 2 m, c) 10 m, d) 30 m, e) 100 m, f) 250 m, g) 1000 m, d) SOC–Tot stored under wetland classes as mapped from the land cover classification.

*Code S 1: Code used in this article is accessible under:*

<https://github.com/MatthiasSiewert/AbiskoDSM>
